# Supplementary material for: Machine Learning Establishes Single-Cell Calcium Dynamics as an Early Indicator of Antibiotic Response
Source: Microorganisms. 2021 May 5;9(5):1000. doi: 10.3390/microorganisms9051000 (PMC8148219; doi:10.3390/microorganisms9051000)
Supplement: Supplementary file 1 [file microorganisms-09-01000-s001.zip]

Archive with 12 entries (12 files):
- microorganisms-1170637-supplementary.pdf
- Supplemental_Videos/Video S1_segmentation-video/panels/A.avi
- Supplemental_Videos/Video S1_segmentation-video/panels/B.avi
- Supplemental_Videos/Video S1_segmentation-video/panels/note.txt
- Supplemental_Videos/Video S1_segmentation-video/panels/VideoS1B.avi
- Supplemental_Videos/Video S1_segmentation-video/VideoS1.avi
- Supplemental_Videos/Video S2_BSub/frames_used.txt
- Supplemental_Videos/Video S2_BSub/VideoS2.avi
- Supplemental_Videos/Video S2_PmB+-CCCP/panels/note.txt
- Supplemental_Videos/Video S2_PmB+-CCCP/panels/VS2_PanelA.avi
- Supplemental_Videos/Video S2_PmB+-CCCP/panels/VS2_PanelB.avi
- Supplemental_Videos/Video S2_PmB+-CCCP/VideoS2.avi
