# Supplementary material for: Machine Learning Establishes Single-Cell Calcium Dynamics as an Early Indicator of Antibiotic Response
Source: Microorganisms. 2021 May 5;9(5):1000. doi: 10.3390/microorganisms9051000 (PMC8148219; doi:10.3390/microorganisms9051000)
Supplement: Supplementary file 1 [file microorganisms-09-01000-s001.zip › Supplemental_Videos/Video S1_segmentation-video/panels/note.txt]

taken from 

/mnt/kralj_celery/E coli GC antibioitic/2020-12-17-kan_dilution_gcamp_cm/2021-01-15_Results/AVIs/D12_BW25113_gCAMP_KanR_kan_0
for resistant and
/mnt/kralj_celery/E coli GC antibioitic/2020-12-17-kan_dilution_gcamp_cm/2021-01-15_Results/AVIs/C08_BW25113_gCAMP_kan_100
for sensitive
