# Supplementary material for: Machine Learning Establishes Single-Cell Calcium Dynamics as an Early Indicator of Antibiotic Response
Source: Microorganisms. 2021 May 5;9(5):1000. doi: 10.3390/microorganisms9051000 (PMC8148219; doi:10.3390/microorganisms9051000)
Supplement: Supplementary file 1 [file microorganisms-09-01000-s001.zip › Supplemental_Videos/Video S2_BSub/frames_used.txt]

H02_002  G02_001
