# Supplementary material for: Machine Learning Establishes Single-Cell Calcium Dynamics as an Early Indicator of Antibiotic Response
Source: Microorganisms. 2021 May 5;9(5):1000. doi: 10.3390/microorganisms9051000 (PMC8148219; doi:10.3390/microorganisms9051000)
Supplement: Supplementary file 1 [file microorganisms-09-01000-s001.zip › Supplemental_Videos/Video S2_PmB+-CCCP/panels/note.txt]

taken from 

/mnt/kralj_celery/E coli GC antibioitic/2021-03-11-pmb_pi_ccp_cm/2021-03-12_Results/AVIs/A11_BW25113_GCaMP_PmB_10_003
for right panel and
/mnt/kralj_celery/E coli GC antibioitic/2021-03-11-pmb_pi_ccp_cm/2021-03-12_Results/AVIs/E11_BW25113_GCaMP_PmB_10_004
for sensitive
